# Supplementary material for: The effect of tartrate on the mild leaching of low-grade polymetallic complex chalcopyrite ore in acidic ferric chloride solution
Source: Royal Society of Chemistry journal article supplement (doi:10.1039/d3nj01998e), 2023-01-01
Supplement: d3nj01998e1.pdf [file d3nj01998e1.pdf]

**Supplementary Information**

**Effect of tartrate on the mild leaching of low-grade polymetallic complex  
chalcopyrite ore in acidic ferric chloride solution**

Xin-Jie Liu <sup>a</sup>, Yalong Liao <sup>a,\*</sup>, Qingfeng Liu <sup>a</sup>, Min Wu <sup>a</sup>

<sup>a</sup> Faculty of Metallurgical and Energy Engineering, Kunming University of Science and Technology,

Kunming 650093, Yunnan, China. \* E-mail: liaoylsy@163.com.

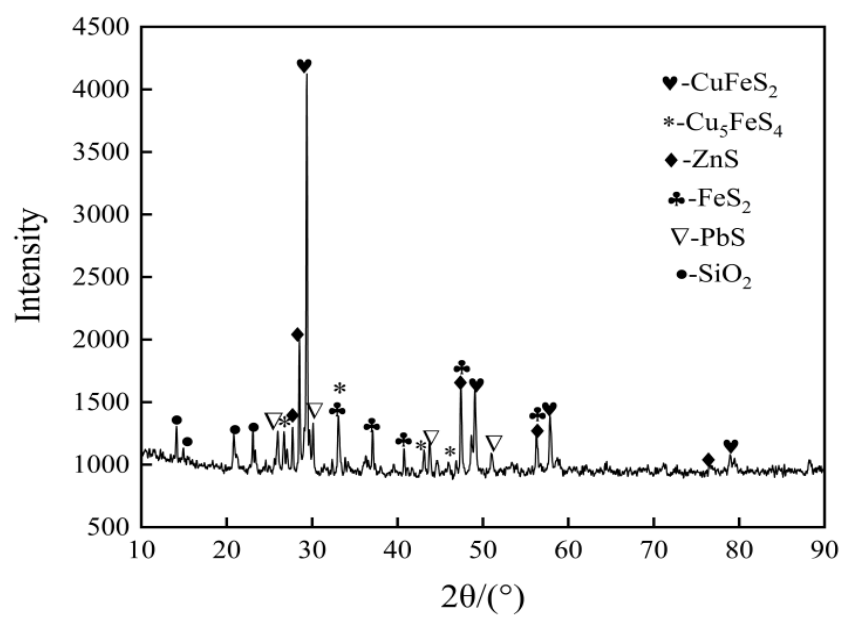

Fig.S1 XRD pattern of raw materials

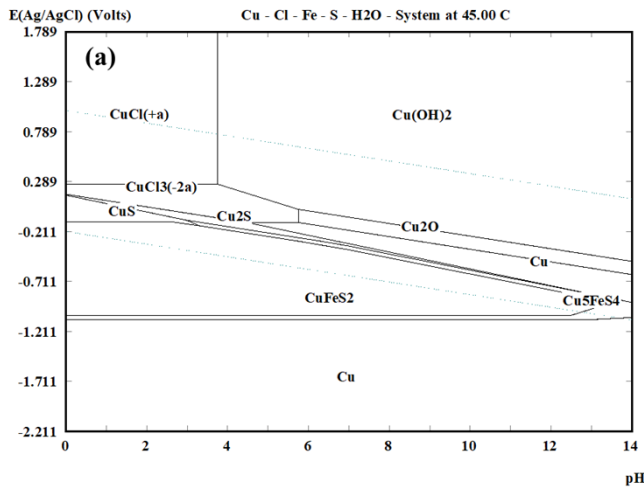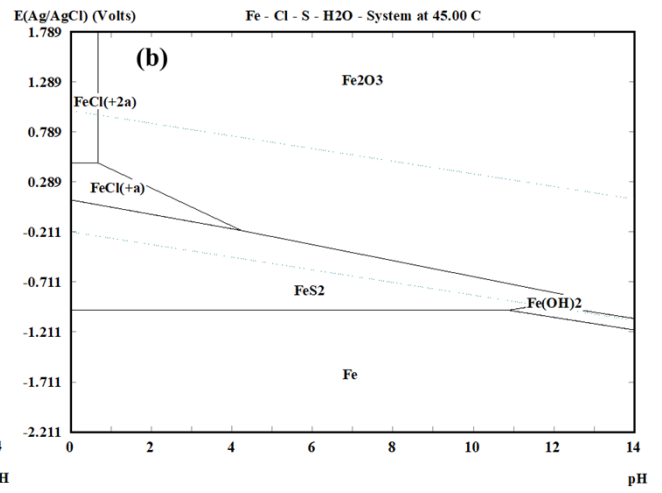

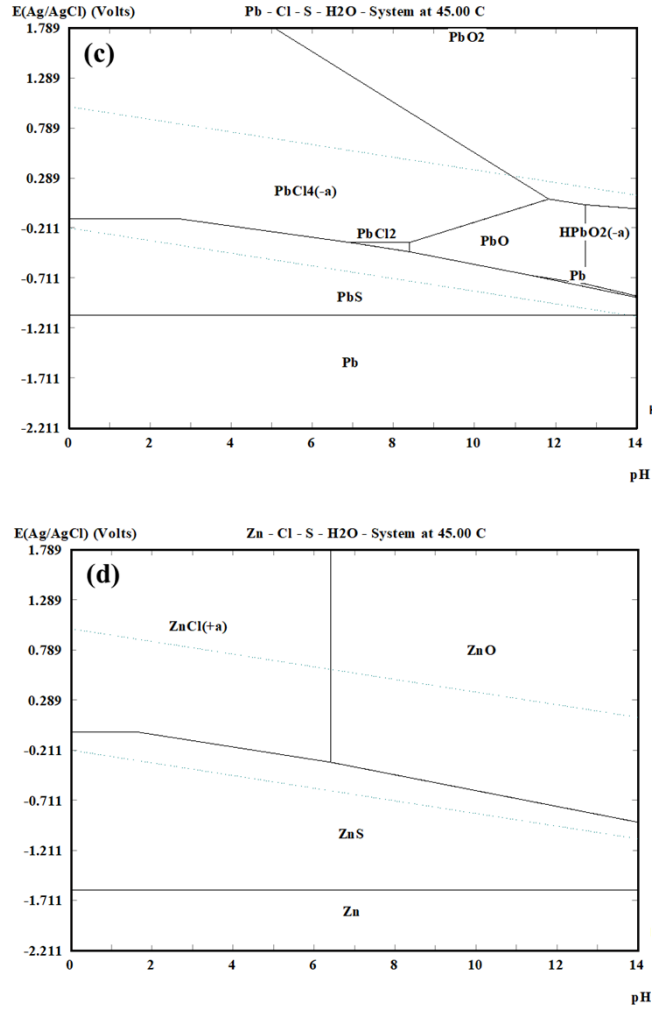

Fig.S2. Calculated Pourbaix diagrams (vs Ag/AgCl) in software of HSC Chemistry for (a) Cu-Fe-S-Cl-H<sub>2</sub>O, (b) Fe-S-Cl-H<sub>2</sub>O, (c) Pb-S-Cl-H<sub>2</sub>O and (d) Zn-S-Cl-H<sub>2</sub>O systems at 318 K by using the value of  $\alpha(\text{Cl})=1.3 \text{ M}$ ,  $\alpha(\text{Cu})=0.07 \text{ M}$ ,  $\alpha(\text{Fe})=0.3 \text{ M}$ ,  $\alpha(\text{Pb})=\alpha(\text{Zn})=0.017 \text{ M}$ , and  $\alpha(\text{S})=0.001\text{M}$ .
